# Supplementary material
Source: PubMed Central journal article supplement (PMC1383644)
Supplement: plntcell_tpc.105.039172_2.pdf [file plntcell_tpc.105.039172_2.pdf]

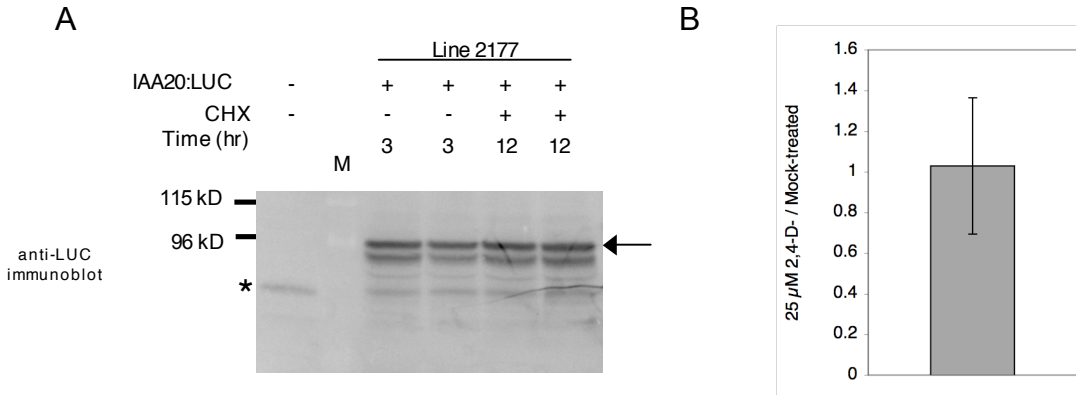

**Supplemental Figure 2** Full-length IAA20:LUC is long-lived and not responsive to auxin.

**(A)** A 12 hr treatment with cycloheximide does not diminish the levels of the IAA20:LUC fusion protein or promote luciferase cleavage, compared to samples mock-treated for 3 hr. Immunoblot performed with anti-luciferase antibodies. Arrow points to IAA20:LUC protein observed in Figure 5C. Two additional IAA20:LUC bands migrate more quickly but appear to be equally stable to the most slowly-migrating band. An asterisk marks a non-specific cross-reacting band used as a loading control. The lane without IAA20:LUC contains extract from mock-treated seedlings expressing the IAA20:4xMyc protein, and the adjacent lane contains markers (M). The IAA20:LUC fusion protein runs larger than its predicted size of ~80 kDa. The predicted size of luciferase is ~61 kDa. There is no evidence of free luciferase in the IAA20:LUC samples.

**(B)** Luciferase activity did not drop in *Arabidopsis* seedlings expressing IAA20:LUC following a 12 hr treatment with 25  $\mu$ M 2,4-D. Graphed as in 2C. Data for IAA20:LUC from 3 lines in a total of 4 experiments.
