# Supplementary material
Source: PubMed Central journal article supplement (PMC1383644)
Supplement: plntcell_tpc.105.039172_3.pdf [file plntcell_tpc.105.039172_3.pdf]

**A**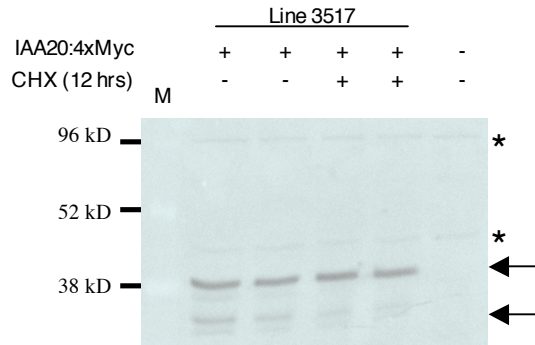**B**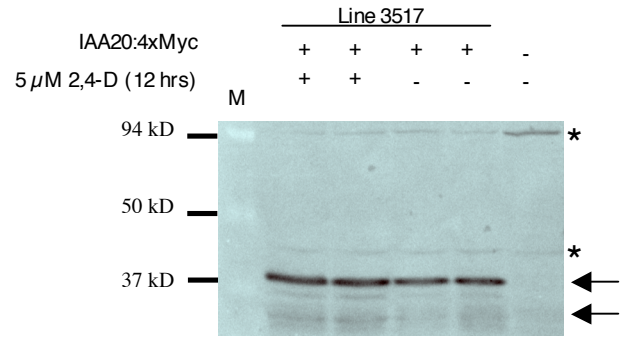**Supplemental Figure 3**

IAA20:4xMyc is long-lived and its levels do not drop in response to auxin.

**(A)** A 12 hr treatment with cycloheximide does not diminish the levels of the IAA20:4xMyc fusion protein. Immunoblot performed with anti-Myc antibodies. Arrows point to two forms of the IAA20:4xMyc protein with different mobilities. Upper band migrates above the predicted molecular mass of approximately 27 kDa. Asterisks mark non-specific cross-reacting bands used as loading controls. Markers (M) are indicated. Lane without IAA20:4xMyc contains extract from mock-treated seedlings expressing IAA20:LUC. **(B)** IAA20:4xMyc levels do not drop following a 12 hr treatment with 5  $\mu$ M 2,4-D. Immunoblot performed with anti-myc antibodies and labeled as in (A). Lane without 10xMyc:IAA20 contains extract from mock-treated domain II (D2):LUC:NLS seedlings treated in parallel to verify cycloheximide effectiveness.
