# Supplementary material
Source: PubMed Central journal article supplement (PMC1383644)
Supplement: plntcell_tpc.105.039172_5.pdf [file plntcell_tpc.105.039172_5.pdf]

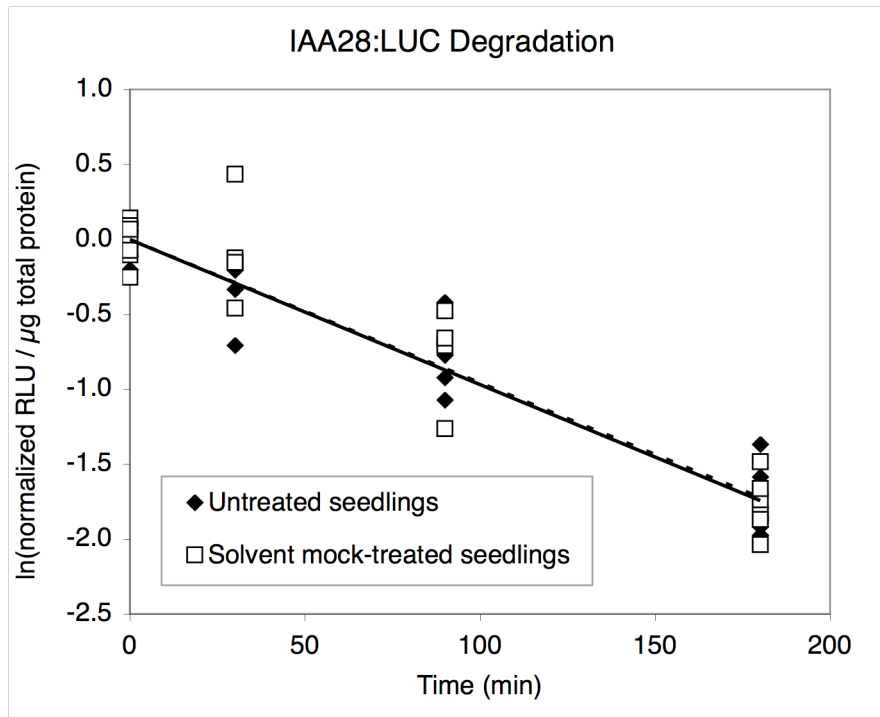

**Supplemental Figure 5**

Solvent mock control for auxin treatment does not affect Aux/IAA:LUC degradation. Standard half-life experiments were performed using seedlings expressing IAA28:LUC following no pre-treatment, or a 2 hr pre-treatment and continuing incubation with 0.1 M KOH diluted in GM. 0.1 M KOH serves as the solvent for 2,4-D and this mock treatment represents a control solution for a 5  $\mu\text{M}$  2,4-D treatment. Degradation curves are plotted for the untreated (solid) and solvent mock-treated (dashed) experiments. Data for untreated samples from 2 lines, 3 exp. Data for solvent mock-treated samples from 2 lines, 3 exp.
